# Supplementary material for: Nevirapine induced mitochondrial dysfunction in HepG2 cells
Source: PubMed Central journal article supplement (PMC5569014; doi:10.1038/s41598-017-09321-y), 2017-08-23
Supplement: 41598_2017_9321_MOESM1_ESM.pdf [file 41598_2017_9321_MOESM1_ESM.pdf]

## Supplementary Files

### **Nevirapine induced mitochondrial dysfunction in HepG2 cells**

Atchara Paemanee<sup>a,b</sup>, Wannapa Sornjai<sup>a</sup>, Suthathip Kittisenachai<sup>b</sup>, Naraporn Sirinonthanawech<sup>a</sup>, Sittiruk Roytrakul<sup>b</sup>, Jeerang Wongtrakul<sup>c\*</sup>, Duncan R. Smith<sup>a,\*</sup>

<sup>a</sup>Institute of Molecular Biosciences, Mahidol University, Bangkok, Thailand

<sup>b</sup>Genome Technology Research Unit, National Center for Genetic Engineering and Biotechnology, National Science and Technology Development Agency, Pathumthani, Thailand

<sup>c</sup>Research Institute for Health Sciences, Chiang Mai University, Chiang Mai, Thailand

\* Address correspondence to either:

Duncan R. Smith, [duncan.smi@mahidol.ac.th](mailto:duncan.smi@mahidol.ac.th); [duncan\\_r\\_smith@hotmail.com](mailto:duncan_r_smith@hotmail.com)

or

Jeerang Wongtrakul, [jeerang@gmail.com](mailto:jeerang@gmail.com)

Supplemental File S1: Full list of annotation clusters identified by DAVID

Supplemental File S2: Full list of cellular components identified by PANTHER

## Functional Annotation Clustering

[Help and Manual](#)

Current Gene List: [List\\_2](#)

Current Background: [Homo sapiens](#)

33 DAVID IDs

Options Classification Stringency Medium

### 15 Cluster(s)

 [Download File](#)

|                          | Annotation Cluster 1 | Enrichment Score: 3.22                           | <b>G</b> |    | Count | P_Value | Benjamini |
|--------------------------|----------------------|--------------------------------------------------|----------|---------------------------------------------------------------------------------------|-------|---------|-----------|
| <input type="checkbox"/> | GOTERM_CC_FAT        | <a href="#">mitochondrial part</a>               | RT       |      | 12    | 1.3E-8  | 1.5E-6    |
| <input type="checkbox"/> | GOTERM_CC_FAT        | <a href="#">mitochondrial matrix</a>             | RT       |      | 9     | 1.5E-8  | 8.3E-7    |
| <input type="checkbox"/> | GOTERM_CC_FAT        | <a href="#">mitochondrial lumen</a>              | RT       |      | 9     | 1.5E-8  | 8.3E-7    |
| <input type="checkbox"/> | GOTERM_CC_FAT        | <a href="#">nucleoid</a>                         | RT       |      | 5     | 4.8E-7  | 1.8E-5    |
| <input type="checkbox"/> | GOTERM_CC_FAT        | <a href="#">mitochondrial nucleoid</a>           | RT       |      | 5     | 4.8E-7  | 1.8E-5    |
| <input type="checkbox"/> | GOTERM_CC_FAT        | <a href="#">mitochondrion</a>                    | RT       |      | 13    | 7.0E-7  | 2.0E-5    |
| <input type="checkbox"/> | UP_SEQ_FEATURE       | transit peptide:Mitochondrion                    | RT       |      | 9     | 7.5E-7  | 2.4E-4    |
| <input type="checkbox"/> | SP_PIR_KEYWORDS      | <a href="#">transit peptide</a>                  | RT       |      | 9     | 8.3E-7  | 6.2E-5    |
| <input type="checkbox"/> | SP_PIR_KEYWORDS      | <a href="#">mitochondrion</a>                    | RT       |      | 10    | 5.8E-6  | 2.2E-4    |
| <input type="checkbox"/> | GOTERM_CC_FAT        | <a href="#">mitochondrial membrane</a>           | RT       |      | 8     | 1.3E-5  | 3.0E-4    |
| <input type="checkbox"/> | GOTERM_CC_FAT        | <a href="#">mitochondrial envelope</a>           | RT       |      | 8     | 1.9E-5  | 3.7E-4    |
| <input type="checkbox"/> | GOTERM_CC_FAT        | <a href="#">organelle envelope</a>               | RT       |      | 9     | 2.9E-5  | 4.7E-4    |
| <input type="checkbox"/> | GOTERM_CC_FAT        | <a href="#">envelope</a>                         | RT       |      | 9     | 2.9E-5  | 4.2E-4    |
| <input type="checkbox"/> | GOTERM_CC_FAT        | <a href="#">mitochondrial inner membrane</a>     | RT       |    | 7     | 3.5E-5  | 4.4E-4    |
| <input type="checkbox"/> | GOTERM_CC_FAT        | <a href="#">organelle inner membrane</a>         | RT       |    | 7     | 5.2E-5  | 5.9E-4    |
| <input type="checkbox"/> | GOTERM_CC_FAT        | <a href="#">intracellular organelle lumen</a>    | RT       |    | 12    | 5.6E-4  | 5.8E-3    |
| <input type="checkbox"/> | GOTERM_CC_FAT        | <a href="#">organelle lumen</a>                  | RT       |    | 12    | 6.8E-4  | 6.5E-3    |
| <input type="checkbox"/> | GOTERM_CC_FAT        | <a href="#">membrane-enclosed lumen</a>          | RT       |    | 12    | 8.1E-4  | 7.1E-3    |
| <input type="checkbox"/> | GOTERM_CC_FAT        | <a href="#">organelle membrane</a>               | RT       |    | 8     | 6.4E-3  | 4.8E-2    |
| <input type="checkbox"/> | KEGG_PATHWAY         | <a href="#">Parkinson's disease</a>              | RT       |    | 4     | 8.2E-3  | 7.1E-2    |
| <input type="checkbox"/> | KEGG_PATHWAY         | <a href="#">Alzheimer's disease</a>              | RT       |    | 4     | 1.6E-2  | 9.1E-2    |
| <input type="checkbox"/> | GOTERM_BP_FAT        | <a href="#">oxidative phosphorylation</a>        | RT       |    | 3     | 1.6E-2  | 4.2E-1    |
| <input type="checkbox"/> | KEGG_PATHWAY         | <a href="#">Huntington's disease</a>             | RT       |    | 4     | 2.1E-2  | 1.0E-1    |
| <input type="checkbox"/> | GOTERM_CC_FAT        | <a href="#">mitochondrial membrane part</a>      | RT       |    | 3     | 2.8E-2  | 1.7E-1    |
| <input type="checkbox"/> | SP_PIR_KEYWORDS      | <a href="#">mitochondrion inner membrane</a>     | RT       |    | 3     | 4.1E-2  | 3.1E-1    |
| <input type="checkbox"/> | KEGG_PATHWAY         | <a href="#">Oxidative phosphorylation</a>        | RT       |    | 3     | 6.9E-2  | 2.7E-1    |
| <input type="checkbox"/> | SP_PIR_KEYWORDS      | <a href="#">ion transport</a>                    | RT       |    | 4     | 7.0E-2  | 4.4E-1    |
| <input type="checkbox"/> | SP_PIR_KEYWORDS      | <a href="#">transport</a>                        | RT       |    | 6     | 1.4E-1  | 6.6E-1    |
| <input type="checkbox"/> | GOTERM_BP_FAT        | <a href="#">ion transport</a>                    | RT       |    | 4     | 2.0E-1  | 9.0E-1    |
| <input type="checkbox"/> | GOTERM_BP_FAT        | <a href="#">phosphorylation</a>                  | RT       |    | 4     | 2.1E-1  | 9.0E-1    |
| <input type="checkbox"/> | SP_PIR_KEYWORDS      | <a href="#">hydrolase</a>                        | RT       |    | 5     | 2.6E-1  | 8.7E-1    |
| <input type="checkbox"/> | GOTERM_BP_FAT        | <a href="#">phosphorus metabolic process</a>     | RT       |    | 4     | 3.1E-1  | 9.5E-1    |
| <input type="checkbox"/> | GOTERM_BP_FAT        | <a href="#">phosphate metabolic process</a>      | RT       |    | 4     | 3.1E-1  | 9.5E-1    |
| <input type="checkbox"/> | GOTERM_BP_FAT        | <a href="#">transmembrane transport</a>          | RT       |    | 3     | 3.2E-1  | 9.5E-1    |
| <input type="checkbox"/> | SP_PIR_KEYWORDS      | <a href="#">membrane</a>                         | RT       |    | 10    | 7.6E-1  | 1.0E0     |
| <input type="checkbox"/> | GOTERM_CC_FAT        | <a href="#">plasma membrane</a>                  | RT       |    | 6     | 9.4E-1  | 1.0E0     |
|                          | Annotation Cluster 2 | Enrichment Score: 2.47                           | <b>G</b> |  | Count | P_Value | Benjamini |
| <input type="checkbox"/> | SP_PIR_KEYWORDS      | <a href="#">gluconeogenesis</a>                  | RT       |    | 4     | 4.0E-6  | 2.0E-4    |
| <input type="checkbox"/> | KEGG_PATHWAY         | <a href="#">Glycolysis / Gluconeogenesis</a>     | RT       |    | 4     | 9.4E-4  | 3.3E-2    |
| <input type="checkbox"/> | SP_PIR_KEYWORDS      | <a href="#">glycolysis</a>                       | RT       |    | 3     | 2.4E-3  | 4.4E-2    |
| <input type="checkbox"/> | GOTERM_BP_FAT        | <a href="#">glucose metabolic process</a>        | RT       |    | 4     | 3.4E-3  | 4.3E-1    |
| <input type="checkbox"/> | GOTERM_BP_FAT        | <a href="#">glycolysis</a>                       | RT       |    | 3     | 3.9E-3  | 3.9E-1    |
| <input type="checkbox"/> | GOTERM_BP_FAT        | <a href="#">glucose catabolic process</a>        | RT       |    | 3     | 5.9E-3  | 4.5E-1    |
| <input type="checkbox"/> | GOTERM_BP_FAT        | <a href="#">hexose metabolic process</a>         | RT       |    | 4     | 6.4E-3  | 4.1E-1    |
| <input type="checkbox"/> | GOTERM_BP_FAT        | <a href="#">hexose catabolic process</a>         | RT       |    | 3     | 8.3E-3  | 4.5E-1    |
| <input type="checkbox"/> | GOTERM_BP_FAT        | <a href="#">monosaccharide catabolic process</a> | RT       |    | 3     | 8.8E-3  | 4.2E-1    |

|                          | Annotation Cluster   | Enrichment Score                                                                         | Gene | Bar | Count | P_Value | Benjamini |
|--------------------------|----------------------|------------------------------------------------------------------------------------------|------|-----|-------|---------|-----------|
| <input type="checkbox"/> | Annotation Cluster 1 | 3.22                                                                                     |      |     |       |         |           |
| <input type="checkbox"/> | GOTERM_BP_FAT        | <a href="#">monosaccharide metabolic process</a>                                         | RT   |     | 4     | 9.5E-3  | 4.1E-1    |
| <input type="checkbox"/> | GOTERM_BP_FAT        | <a href="#">alcohol catabolic process</a>                                                | RT   |     | 3     | 1.1E-2  | 4.3E-1    |
| <input type="checkbox"/> | GOTERM_BP_FAT        | <a href="#">cellular carbohydrate catabolic process</a>                                  | RT   |     | 3     | 1.2E-2  | 4.3E-1    |
| <input type="checkbox"/> | GOTERM_BP_FAT        | <a href="#">carbohydrate catabolic process</a>                                           | RT   |     | 3     | 2.0E-2  | 4.1E-1    |
| <input type="checkbox"/> | Annotation Cluster 3 | 2.43                                                                                     |      |     |       |         |           |
| <input type="checkbox"/> | GOTERM_MF_FAT        | <a href="#">NAD or NADH binding</a>                                                      | RT   |     | 4     | 1.5E-4  | 2.8E-2    |
| <input type="checkbox"/> | SP_PIR_KEYWORDS      | <a href="#">oxidoreductase</a>                                                           | RT   |     | 7     | 2.9E-4  | 8.5E-3    |
| <input type="checkbox"/> | GOTERM_BP_FAT        | <a href="#">oxidation reduction</a>                                                      | RT   |     | 7     | 1.4E-3  | 2.9E-1    |
| <input type="checkbox"/> | GOTERM_MF_FAT        | <a href="#">cofactor binding</a>                                                         | RT   |     | 5     | 2.2E-3  | 9.4E-2    |
| <input type="checkbox"/> | GOTERM_MF_FAT        | <a href="#">coenzyme binding</a>                                                         | RT   |     | 4     | 7.5E-3  | 1.8E-1    |
| <input type="checkbox"/> | SP_PIR_KEYWORDS      | <a href="#">nadp</a>                                                                     | RT   |     | 3     | 2.8E-2  | 2.4E-1    |
| <input type="checkbox"/> | INTERPRO             | <a href="#">NAD(P)-binding domain</a>                                                    | RT   |     | 3     | 3.3E-2  | 8.3E-1    |
| <input type="checkbox"/> | SP_PIR_KEYWORDS      | <a href="#">nad</a>                                                                      | RT   |     | 3     | 3.9E-2  | 3.1E-1    |
| <input type="checkbox"/> | Annotation Cluster 4 | 2.2                                                                                      |      |     |       |         |           |
| <input type="checkbox"/> | KEGG_PATHWAY         | <a href="#">Propanoate metabolism</a>                                                    | RT   |     | 3     | 4.9E-3  | 8.5E-2    |
| <input type="checkbox"/> | KEGG_PATHWAY         | <a href="#">Butanoate metabolism</a>                                                     | RT   |     | 3     | 5.5E-3  | 6.5E-2    |
| <input type="checkbox"/> | KEGG_PATHWAY         | <a href="#">Valine, leucine and isoleucine degradation</a>                               | RT   |     | 3     | 9.2E-3  | 6.4E-2    |
| <input type="checkbox"/> | Annotation Cluster 5 | 1.67                                                                                     |      |     |       |         |           |
| <input type="checkbox"/> | GOTERM_CC_FAT        | <a href="#">intracellular non-membrane-bounded organelle</a>                             | RT   |     | 12    | 1.2E-2  | 8.4E-2    |
| <input type="checkbox"/> | GOTERM_CC_FAT        | <a href="#">non-membrane-bounded organelle</a>                                           | RT   |     | 12    | 1.2E-2  | 8.4E-2    |
| <input type="checkbox"/> | GOTERM_CC_FAT        | <a href="#">cytoskeleton</a>                                                             | RT   |     | 7     | 6.4E-2  | 3.0E-1    |
| <input type="checkbox"/> | Annotation Cluster 6 | 1.57                                                                                     |      |     |       |         |           |
| <input type="checkbox"/> | GOTERM_BP_FAT        | <a href="#">ATP biosynthetic process</a>                                                 | RT   |     | 3     | 1.4E-2  | 4.1E-1    |
| <input type="checkbox"/> | GOTERM_BP_FAT        | <a href="#">purine ribonucleoside triphosphate biosynthetic process</a>                  | RT   |     | 3     | 1.6E-2  | 4.2E-1    |
| <input type="checkbox"/> | GOTERM_BP_FAT        | <a href="#">purine nucleoside triphosphate biosynthetic process</a>                      | RT   |     | 3     | 1.7E-2  | 4.1E-1    |
| <input type="checkbox"/> | GOTERM_BP_FAT        | <a href="#">ribonucleoside triphosphate biosynthetic process</a>                         | RT   |     | 3     | 1.7E-2  | 4.1E-1    |
| <input type="checkbox"/> | GOTERM_BP_FAT        | <a href="#">nucleoside triphosphate biosynthetic process</a>                             | RT   |     | 3     | 1.7E-2  | 4.0E-1    |
| <input type="checkbox"/> | GOTERM_BP_FAT        | <a href="#">ATP metabolic process</a>                                                    | RT   |     | 3     | 1.8E-2  | 4.0E-1    |
| <input type="checkbox"/> | GOTERM_BP_FAT        | <a href="#">purine ribonucleotide biosynthetic process</a>                               | RT   |     | 3     | 2.3E-2  | 4.3E-1    |
| <input type="checkbox"/> | GOTERM_BP_FAT        | <a href="#">purine ribonucleoside triphosphate metabolic process</a>                     | RT   |     | 3     | 2.3E-2  | 4.3E-1    |
| <input type="checkbox"/> | GOTERM_BP_FAT        | <a href="#">ribonucleoside triphosphate metabolic process</a>                            | RT   |     | 3     | 2.3E-2  | 4.2E-1    |
| <input type="checkbox"/> | GOTERM_BP_FAT        | <a href="#">purine nucleoside triphosphate metabolic process</a>                         | RT   |     | 3     | 2.4E-2  | 4.2E-1    |
| <input type="checkbox"/> | GOTERM_BP_FAT        | <a href="#">ribonucleotide biosynthetic process</a>                                      | RT   |     | 3     | 2.5E-2  | 4.1E-1    |
| <input type="checkbox"/> | GOTERM_BP_FAT        | <a href="#">nitrogen compound biosynthetic process</a>                                   | RT   |     | 4     | 2.6E-2  | 4.1E-1    |
| <input type="checkbox"/> | GOTERM_BP_FAT        | <a href="#">nucleoside triphosphate metabolic process</a>                                | RT   |     | 3     | 2.8E-2  | 4.2E-1    |
| <input type="checkbox"/> | GOTERM_BP_FAT        | <a href="#">purine ribonucleotide metabolic process</a>                                  | RT   |     | 3     | 3.1E-2  | 4.4E-1    |
| <input type="checkbox"/> | GOTERM_BP_FAT        | <a href="#">ribonucleotide metabolic process</a>                                         | RT   |     | 3     | 3.4E-2  | 4.5E-1    |
| <input type="checkbox"/> | GOTERM_BP_FAT        | <a href="#">purine nucleotide biosynthetic process</a>                                   | RT   |     | 3     | 3.5E-2  | 4.5E-1    |
| <input type="checkbox"/> | GOTERM_BP_FAT        | <a href="#">purine nucleotide metabolic process</a>                                      | RT   |     | 3     | 5.3E-2  | 5.6E-1    |
| <input type="checkbox"/> | GOTERM_BP_FAT        | <a href="#">nucleotide biosynthetic process</a>                                          | RT   |     | 3     | 5.3E-2  | 5.6E-1    |
| <input type="checkbox"/> | GOTERM_BP_FAT        | <a href="#">nucleobase, nucleoside, nucleotide and nucleic acid biosynthetic process</a> | RT   |     | 3     | 5.6E-2  | 5.7E-1    |
| <input type="checkbox"/> | GOTERM_BP_FAT        | <a href="#">nucleobase, nucleoside and nucleotide biosynthetic process</a>               | RT   |     | 3     | 5.6E-2  | 5.7E-1    |
| <input type="checkbox"/> | Annotation Cluster 7 | 1.38                                                                                     |      |     |       |         |           |
| <input type="checkbox"/> | GOTERM_CC_FAT        | <a href="#">pigment granule</a>                                                          | RT   |     | 4     | 8.5E-4  | 6.9E-3    |
| <input type="checkbox"/> | GOTERM_CC_FAT        | <a href="#">melanosome</a>                                                               | RT   |     | 4     | 8.5E-4  | 6.9E-3    |
| <input type="checkbox"/> | GOTERM_CC_FAT        | <a href="#">membrane-bounded vesicle</a>                                                 | RT   |     | 5     | 3.0E-2  | 1.7E-1    |
| <input type="checkbox"/> | GOTERM_CC_FAT        | <a href="#">vesicle</a>                                                                  | RT   |     | 5     | 5.0E-2  | 2.6E-1    |
| <input type="checkbox"/> | GOTERM_CC_FAT        | <a href="#">cytoplasmic membrane-bounded vesicle</a>                                     | RT   |     | 4     | 1.1E-1  | 4.5E-1    |
| <input type="checkbox"/> | GOTERM_CC_FAT        | <a href="#">cytoplasmic vesicle</a>                                                      | RT   |     | 4     | 1.5E-1  | 5.6E-1    |
| <input type="checkbox"/> | GOTERM_CC_FAT        | <a href="#">endoplasmic reticulum</a>                                                    | RT   |     | 3     | 6.1E-1  | 9.7E-1    |
| <input type="checkbox"/> | GOTERM_CC_FAT        | <a href="#">extracellular region</a>                                                     | RT   |     | 4     | 8.2E-1  | 1.0E0     |
| <input type="checkbox"/> | Annotation Cluster 8 | 1.17                                                                                     |      |     |       |         |           |
| <input type="checkbox"/> | SP_PIR_KEYWORDS      | <a href="#">P-loop</a>                                                                   | RT   |     | 4     | 9.3E-4  | 2.3E-2    |
| <input type="checkbox"/> | SP_PIR_KEYWORDS      | <a href="#">nucleotide-binding</a>                                                       | RT   |     | 9     | 5.3E-3  | 7.7E-2    |
| <input type="checkbox"/> | GOTERM_MF_FAT        | <a href="#">nucleotide binding</a>                                                       | RT   |     | 12    | 6.6E-3  | 1.8E-1    |
| <input type="checkbox"/> | SP_PIR_KEYWORDS      | <a href="#">gtp-binding</a>                                                              | RT   |     | 4     | 1.7E-2  | 1.7E-1    |
| <input type="checkbox"/> | GOTERM_MF_FAT        | <a href="#">purine ribonucleotide binding</a>                                            | RT   |     | 9     | 4.3E-2  | 6.4E-1    |
| <input type="checkbox"/> | GOTERM_MF_FAT        | <a href="#">ribonucleotide binding</a>                                                   | RT   |     | 9     | 4.3E-2  | 6.4E-1    |

| Annotation Cluster 1     |                 | Enrichment Score: 3.22                                       | G  |  | Count | P_Value | Benjamini |
|--------------------------|-----------------|--------------------------------------------------------------|----|--|-------|---------|-----------|
| <input type="checkbox"/> | GOTERM_MF_FAT   | <a href="#">GTP binding</a>                                  | RT |  | 4     | 4.9E-2  | 6.4E-1    |
| <input type="checkbox"/> | GOTERM_MF_FAT   | <a href="#">guanyl ribonucleotide binding</a>                | RT |  | 4     | 5.3E-2  | 6.3E-1    |
| <input type="checkbox"/> | GOTERM_MF_FAT   | <a href="#">guanyl nucleotide binding</a>                    | RT |  | 4     | 5.3E-2  | 6.3E-1    |
| <input type="checkbox"/> | GOTERM_MF_FAT   | <a href="#">purine nucleotide binding</a>                    | RT |  | 9     | 5.4E-2  | 6.1E-1    |
| <input type="checkbox"/> | SP_PIR_KEYWORDS | <a href="#">atp-binding</a>                                  | RT |  | 6     | 6.6E-2  | 4.3E-1    |
| <input type="checkbox"/> | UP_SEQ_FEATURE  | nucleotide phosphate-binding region:GTP                      | RT |  | 3     | 8.7E-2  | 1.0E0     |
| <input type="checkbox"/> | GOTERM_MF_FAT   | <a href="#">purine nucleoside binding</a>                    | RT |  | 7     | 1.4E-1  | 8.8E-1    |
| <input type="checkbox"/> | GOTERM_MF_FAT   | <a href="#">nucleoside binding</a>                           | RT |  | 7     | 1.4E-1  | 8.7E-1    |
| <input type="checkbox"/> | GOTERM_CC_FAT   | <a href="#">cell surface</a>                                 | RT |  | 3     | 1.7E-1  | 5.8E-1    |
| <input type="checkbox"/> | GOTERM_BP_FAT   | <a href="#">phosphorylation</a>                              | RT |  | 4     | 2.1E-1  | 9.0E-1    |
| <input type="checkbox"/> | GOTERM_MF_FAT   | <a href="#">ATP binding</a>                                  | RT |  | 6     | 2.3E-1  | 9.6E-1    |
| <input type="checkbox"/> | GOTERM_MF_FAT   | <a href="#">adenyl ribonucleotide binding</a>                | RT |  | 6     | 2.4E-1  | 9.6E-1    |
| <input type="checkbox"/> | GOTERM_MF_FAT   | <a href="#">adenyl nucleotide binding</a>                    | RT |  | 6     | 2.7E-1  | 9.7E-1    |
| <input type="checkbox"/> | GOTERM_BP_FAT   | <a href="#">phosphorus metabolic process</a>                 | RT |  | 4     | 3.1E-1  | 9.5E-1    |
| <input type="checkbox"/> | GOTERM_BP_FAT   | <a href="#">phosphate metabolic process</a>                  | RT |  | 4     | 3.1E-1  | 9.5E-1    |
| <input type="checkbox"/> | UP_SEQ_FEATURE  | nucleotide phosphate-binding region:ATP                      | RT |  | 3     | 4.8E-1  | 1.0E0     |
| Annotation Cluster 9     |                 | Enrichment Score: 0.93                                       | G  |  | Count | P_Value | Benjamini |
| <input type="checkbox"/> | GOTERM_BP_FAT   | <a href="#">response to organic substance</a>                | RT |  | 6     | 1.3E-2  | 4.2E-1    |
| <input type="checkbox"/> | GOTERM_BP_FAT   | <a href="#">response to organic cyclic substance</a>         | RT |  | 3     | 2.4E-2  | 4.2E-1    |
| <input type="checkbox"/> | GOTERM_CC_FAT   | <a href="#">soluble fraction</a>                             | RT |  | 4     | 2.8E-2  | 1.7E-1    |
| <input type="checkbox"/> | GOTERM_BP_FAT   | <a href="#">response to hormone stimulus</a>                 | RT |  | 3     | 1.7E-1  | 8.8E-1    |
| <input type="checkbox"/> | GOTERM_CC_FAT   | <a href="#">cell fraction</a>                                | RT |  | 5     | 1.9E-1  | 6.2E-1    |
| <input type="checkbox"/> | GOTERM_BP_FAT   | <a href="#">response to endogenous stimulus</a>              | RT |  | 3     | 1.9E-1  | 9.0E-1    |
| <input type="checkbox"/> | GOTERM_CC_FAT   | <a href="#">cytosol</a>                                      | RT |  | 5     | 3.1E-1  | 8.0E-1    |
| <input type="checkbox"/> | GOTERM_CC_FAT   | <a href="#">membrane fraction</a>                            | RT |  | 3     | 5.2E-1  | 9.5E-1    |
| <input type="checkbox"/> | GOTERM_CC_FAT   | <a href="#">insoluble fraction</a>                           | RT |  | 3     | 5.4E-1  | 9.6E-1    |
| Annotation Cluster 10    |                 | Enrichment Score: 0.88                                       | G  |  | Count | P_Value | Benjamini |
| <input type="checkbox"/> | GOTERM_BP_FAT   | <a href="#">protein homooligomerization</a>                  | RT |  | 3     | 1.5E-2  | 4.2E-1    |
| <input type="checkbox"/> | GOTERM_BP_FAT   | <a href="#">protein oligomerization</a>                      | RT |  | 3     | 4.7E-2  | 5.3E-1    |
| <input type="checkbox"/> | GOTERM_MF_FAT   | <a href="#">lipid binding</a>                                | RT |  | 4     | 7.8E-2  | 7.1E-1    |
| <input type="checkbox"/> | GOTERM_BP_FAT   | <a href="#">protein complex assembly</a>                     | RT |  | 3     | 2.7E-1  | 9.3E-1    |
| <input type="checkbox"/> | GOTERM_BP_FAT   | <a href="#">protein complex biogenesis</a>                   | RT |  | 3     | 2.7E-1  | 9.3E-1    |
| <input type="checkbox"/> | GOTERM_BP_FAT   | <a href="#">macromolecular complex assembly</a>              | RT |  | 3     | 3.9E-1  | 9.8E-1    |
| <input type="checkbox"/> | GOTERM_BP_FAT   | <a href="#">macromolecular complex subunit organization</a>  | RT |  | 3     | 4.2E-1  | 9.8E-1    |
| Annotation Cluster 11    |                 | Enrichment Score: 0.73                                       | G  |  | Count | P_Value | Benjamini |
| <input type="checkbox"/> | GOTERM_BP_FAT   | <a href="#">negative regulation of apoptosis</a>             | RT |  | 3     | 1.6E-1  | 8.8E-1    |
| <input type="checkbox"/> | GOTERM_BP_FAT   | <a href="#">negative regulation of programmed cell death</a> | RT |  | 3     | 1.6E-1  | 8.8E-1    |
| <input type="checkbox"/> | GOTERM_BP_FAT   | <a href="#">negative regulation of cell death</a>            | RT |  | 3     | 1.6E-1  | 8.8E-1    |
| <input type="checkbox"/> | GOTERM_BP_FAT   | <a href="#">regulation of apoptosis</a>                      | RT |  | 4     | 2.1E-1  | 9.0E-1    |
| <input type="checkbox"/> | GOTERM_BP_FAT   | <a href="#">regulation of programmed cell death</a>          | RT |  | 4     | 2.2E-1  | 9.0E-1    |
| <input type="checkbox"/> | GOTERM_BP_FAT   | <a href="#">regulation of cell death</a>                     | RT |  | 4     | 2.2E-1  | 9.0E-1    |
| Annotation Cluster 12    |                 | Enrichment Score: 0.66                                       | G  |  | Count | P_Value | Benjamini |
| <input type="checkbox"/> | GOTERM_BP_FAT   | <a href="#">intracellular protein transport</a>              | RT |  | 3     | 1.7E-1  | 8.8E-1    |
| <input type="checkbox"/> | GOTERM_BP_FAT   | <a href="#">protein transport</a>                            | RT |  | 4     | 1.9E-1  | 9.1E-1    |
| <input type="checkbox"/> | GOTERM_BP_FAT   | <a href="#">establishment of protein localization</a>        | RT |  | 4     | 2.0E-1  | 9.0E-1    |
| <input type="checkbox"/> | GOTERM_BP_FAT   | <a href="#">cellular protein localization</a>                | RT |  | 3     | 2.0E-1  | 8.9E-1    |
| <input type="checkbox"/> | GOTERM_BP_FAT   | <a href="#">cellular macromolecule localization</a>          | RT |  | 3     | 2.0E-1  | 8.9E-1    |
| <input type="checkbox"/> | GOTERM_BP_FAT   | <a href="#">protein localization</a>                         | RT |  | 4     | 2.6E-1  | 9.3E-1    |
| <input type="checkbox"/> | GOTERM_BP_FAT   | <a href="#">intracellular transport</a>                      | RT |  | 3     | 3.8E-1  | 9.8E-1    |
| Annotation Cluster 13    |                 | Enrichment Score: 0.6                                        | G  |  | Count | P_Value | Benjamini |
| <input type="checkbox"/> | GOTERM_BP_FAT   | <a href="#">synaptic transmission</a>                        | RT |  | 3     | 1.2E-1  | 8.1E-1    |
| <input type="checkbox"/> | GOTERM_BP_FAT   | <a href="#">transmission of nerve impulse</a>                | RT |  | 3     | 1.5E-1  | 8.8E-1    |
| <input type="checkbox"/> | GOTERM_BP_FAT   | <a href="#">behavior</a>                                     | RT |  | 3     | 2.4E-1  | 9.1E-1    |
| <input type="checkbox"/> | GOTERM_BP_FAT   | <a href="#">cell-cell signaling</a>                          | RT |  | 3     | 3.4E-1  | 9.6E-1    |
| <input type="checkbox"/> | GOTERM_BP_FAT   | <a href="#">neurological system process</a>                  | RT |  | 3     | 7.1E-1  | 1.0E0     |
| Annotation Cluster 14    |                 | Enrichment Score: 0.17                                       | G  |  | Count | P_Value | Benjamini |
| <input type="checkbox"/> | GOTERM_MF_FAT   | <a href="#">calcium ion binding</a>                          | RT |  | 4     | 3.4E-1  | 9.9E-1    |
| <input type="checkbox"/> | GOTERM_MF_FAT   | <a href="#">ion binding</a>                                  | RT |  | 10    | 6.4E-1  | 1.0E0     |
| <input type="checkbox"/> | SP_PIR_KEYWORDS | <a href="#">metal-binding</a>                                | RT |  | 5     | 7.5E-1  | 1.0E0     |
| <input type="checkbox"/> | GOTERM_MF_FAT   | <a href="#">metal ion binding</a>                            | RT |  | 9     | 7.5E-1  | 1.0E0     |

| Annotation Cluster 1     |                 | Enrichment Score: 3.22                       |           | G |  | Count | P_Value | Benjamini |
|--------------------------|-----------------|----------------------------------------------|-----------|---|--|-------|---------|-----------|
| <input type="checkbox"/> | GOTERM_MF_FAT   | <a href="#">cation binding</a>               | <b>RT</b> |   |  | 9     | 7.6E-1  | 1.0E0     |
| <input type="checkbox"/> | GOTERM_MF_FAT   | <a href="#">transition metal ion binding</a> | <b>RT</b> |   |  | 4     | 9.6E-1  | 1.0E0     |
| Annotation Cluster 15    |                 | Enrichment Score: 0.03                       |           | G |  | Count | P_Value | Benjamini |
| <input type="checkbox"/> | SP_PIR_KEYWORDS | <a href="#">cell membrane</a>                | <b>RT</b> |   |  | 4     | 7.2E-1  | 1.0E0     |
| <input type="checkbox"/> | GOTERM_CC_FAT   | <a href="#">plasma membrane</a>              | <b>RT</b> |   |  | 6     | 9.4E-1  | 1.0E0     |
| <input type="checkbox"/> | UP_SEQ_FEATURE  | transmembrane region                         | <b>RT</b> |   |  | 4     | 9.9E-1  | 1.0E0     |
| <input type="checkbox"/> | SP_PIR_KEYWORDS | <a href="#">transmembrane</a>                | <b>RT</b> |   |  | 4     | 9.9E-1  | 1.0E0     |
| <input type="checkbox"/> | GOTERM_CC_FAT   | <a href="#">integral to membrane</a>         | <b>RT</b> |   |  | 4     | 1.0E0   | 1.0E0     |
| <input type="checkbox"/> | GOTERM_CC_FAT   | <a href="#">intrinsic to membrane</a>        | <b>RT</b> |   |  | 4     | 1.0E0   | 1.0E0     |

42 terms were not clustered.

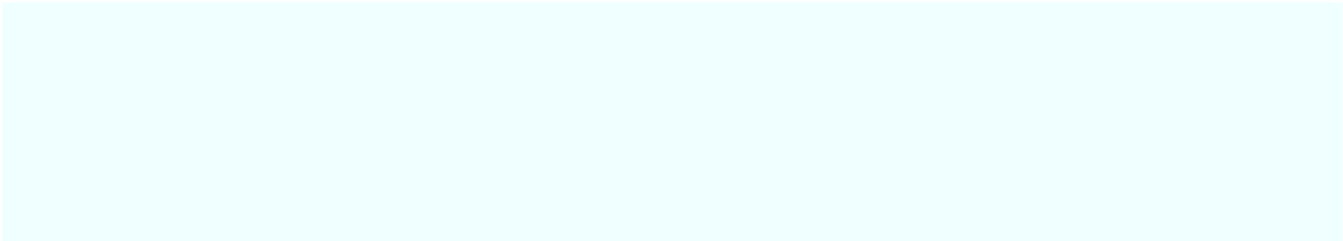

Analysis Summary: Please report in publication [?](#)

|                                                                                                          |                                                             |
|----------------------------------------------------------------------------------------------------------|-------------------------------------------------------------|
| <b>Analysis Type:</b> PANTHER Overrepresentation Test (release 20160715)                                 |                                                             |
| <b>Annotation Version and Release Date:</b> GO Ontology database Released 2016-11-30                     |                                                             |
| <b>Analyzed List:</b>                                                                                    | upload_1 (Homo sapiens) <a href="#">Change</a>              |
| <b>Reference List:</b>                                                                                   | Homo sapiens (all genes in database) <a href="#">Change</a> |
| <b>Annotation Data Set:</b>                                                                              | GO cellular component complete <a href="#">v</a>            |
| <input checked="" type="checkbox"/> Use the Bonferroni correction for multiple testing <a href="#">?</a> |                                                             |

Results [?](#)

|                               | Reference list                     | upload_1                     |
|-------------------------------|------------------------------------|------------------------------|
| Mapped IDs:                   | <a href="#">20972</a> out of 20972 | <a href="#">33</a> out of 36 |
| Unmapped IDs:                 | <a href="#">0</a>                  | <a href="#">0</a>            |
| Multiple mapping information: | <a href="#">0</a>                  | <a href="#">3</a>            |

Bonferroni count: 1304

[Export results](#)

Displaying only results with P<0.05; [click here to display all results](#)

|                                                | Homo sapiens (REF)    | upload_1 ( <a href="#">v</a> Hierarchy <a href="#">NEW!</a> <a href="#">?</a> ) |          |                 |     |          |
|------------------------------------------------|-----------------------|---------------------------------------------------------------------------------|----------|-----------------|-----|----------|
|                                                | #                     | #                                                                               | expected | Fold Enrichment | +/- | P value  |
| <a href="#">GO cellular component complete</a> |                       |                                                                                 |          |                 |     |          |
| <a href="#">mitochondrial nucleoid</a>         | <a href="#">45</a>    | <a href="#">5</a>                                                               | .08      | 64.73           | +   | 2.12E-05 |
| ↳ <a href="#">organelle</a>                    | <a href="#">13117</a> | <a href="#">35</a>                                                              | 22.52    | 1.55            | +   | 1.35E-03 |
| ↳ <a href="#">mitochondrion</a>                | <a href="#">1725</a>  | <a href="#">14</a>                                                              | 2.96     | 4.73            | +   | 5.58E-04 |
| ↳ <a href="#">cytoplasmic part</a>             | <a href="#">8168</a>  | <a href="#">30</a>                                                              | 14.02    | 2.14            | +   | 7.74E-05 |
| ↳ <a href="#">cytoplasm</a>                    | <a href="#">10829</a> | <a href="#">32</a>                                                              | 18.59    | 1.72            | +   | 3.13E-03 |
| ↳ <a href="#">membrane-bounded organelle</a>   | <a href="#">12169</a> | <a href="#">34</a>                                                              | 20.89    | 1.63            | +   | 1.44E-03 |
| ↳ <a href="#">nucleoid</a>                     | <a href="#">47</a>    | <a href="#">5</a>                                                               | .08      | 61.97           | +   | 2.62E-05 |
| ↳ <a href="#">mitochondrial part</a>           | <a href="#">1002</a>  | <a href="#">11</a>                                                              | 1.72     | 6.40            | +   | 7.61E-04 |
| ↳ <a href="#">mitochondrial matrix</a>         | <a href="#">428</a>   | <a href="#">9</a>                                                               | .73      | 12.25           | +   | 4.58E-05 |
| <a href="#">myelin sheath</a>                  | <a href="#">179</a>   | <a href="#">9</a>                                                               | .31      | 29.29           | +   | 2.40E-08 |
| <a href="#">mitochondrial inner membrane</a>   | <a href="#">505</a>   | <a href="#">8</a>                                                               | .87      | 9.23            | +   | 2.44E-03 |
| ↳ <a href="#">mitochondrial membrane</a>       | <a href="#">700</a>   | <a href="#">8</a>                                                               | 1.20     | 6.66            | +   | 2.63E-02 |
| ↳ <a href="#">mitochondrial envelope</a>       | <a href="#">741</a>   | <a href="#">8</a>                                                               | 1.27     | 6.29            | +   | 3.94E-02 |
| ↳ <a href="#">organelle envelope</a>           | <a href="#">1155</a>  | <a href="#">11</a>                                                              | 1.98     | 5.55            | +   | 3.05E-03 |
| ↳ <a href="#">envelope</a>                     | <a href="#">1161</a>  | <a href="#">11</a>                                                              | 1.99     | 5.52            | +   | 3.21E-03 |
| ↳ <a href="#">organelle inner membrane</a>     | <a href="#">563</a>   | <a href="#">8</a>                                                               | .97      | 8.28            | +   | 5.43E-03 |

|                                             |                      |                    |      |      |            |
|---------------------------------------------|----------------------|--------------------|------|------|------------|
| <a href="#">extracellular matrix</a>        | <a href="#">522</a>  | <a href="#">8</a>  | .90  | 8.93 | + 3.11E-03 |
| ↳ <a href="#">extracellular region part</a> | <a href="#">3841</a> | <a href="#">28</a> | 6.59 | 4.25 | + 1.90E-11 |
| ↳ <a href="#">extracellular region</a>      | <a href="#">4564</a> | <a href="#">29</a> | 7.83 | 3.70 | + 1.30E-10 |
| <a href="#">adherens junction</a>           | <a href="#">684</a>  | <a href="#">8</a>  | 1.17 | 6.81 | + 2.23E-02 |
| ↳ <a href="#">anchoring junction</a>        | <a href="#">702</a>  | <a href="#">8</a>  | 1.21 | 6.64 | + 2.68E-02 |
| <a href="#">extracellular exosome</a>       | <a href="#">2750</a> | <a href="#">26</a> | 4.72 | 5.51 | + 9.88E-13 |
| ↳ <a href="#">extracellular vesicle</a>     | <a href="#">2764</a> | <a href="#">26</a> | 4.74 | 5.48 | + 1.12E-12 |
| ↳ <a href="#">vesicle</a>                   | <a href="#">4051</a> | <a href="#">27</a> | 6.95 | 3.88 | + 1.01E-09 |
| ↳ <a href="#">extracellular organelle</a>   | <a href="#">2765</a> | <a href="#">26</a> | 4.75 | 5.48 | + 1.13E-12 |
